# Supplementary material for: A “three-in-one” strategy based on an on-demand multifunctional fluorescent amphoteric polymer for ecological leather manufacturing: a disruptive wet-finishing technique
Source: Royal Society of Chemistry journal article supplement (doi:10.1039/d3gc01446k), 2023-01-01
Supplement: d3gc01446k1.pdf [file d3gc01446k1.pdf]

## Supplementary Information

### 1. Tables of wet finishing processes

Tab. S1 Traditional wet finishing process

| Process                      | Materials                         | Dosage/<br>% | Temperature<br>/°C | Time/<br>min | pH         |
|------------------------------|-----------------------------------|--------------|--------------------|--------------|------------|
| Degreasing                   | Water                             | 200          | 45                 |              |            |
|                              | Degreasing agent                  | 1            |                    | 60           |            |
| Washing                      | Water                             | 300          | 37                 | 10           |            |
|                              | Water                             | 100          | 37                 |              |            |
| Neutralizing                 | Neutralizing agent                | 2            |                    |              |            |
|                              | Sodium formate                    | 1            |                    | 40           |            |
|                              | Sodium bicarbonate                | 0.2          |                    | 40           | 5.0        |
| <b>Retanning<sup>®</sup></b> | <b>Water</b>                      | <b>100</b>   | <b>40</b>          |              |            |
|                              | <b>Acrylic retanning agent</b>    | <b>6</b>     |                    | <b>60</b>    |            |
| <b>Fatliquoring</b>          | <b>Water</b>                      | <b>150</b>   | <b>50</b>          |              |            |
|                              | <b>Anionic fatliquoring agent</b> | <b>20</b>    |                    | <b>50</b>    |            |
| <b>Dyeing</b>                | <b>Yellow dyes</b>                | <b>2</b>     |                    | <b>50</b>    |            |
|                              | <b>Formic acid<sup>®</sup></b>    | <b>1.2</b>   |                    |              | <b>3.5</b> |
| Washing                      | Water                             | 300          | 25                 | 5            |            |
| Hang drying                  |                                   |              |                    |              |            |

Tab. S2 Wet finishing process of pADD-DMENA

| Process              | Materials                               | Dosage/<br>% <sup>①</sup> | Temperature/<br>°C | Time/<br>min | pH  |
|----------------------|-----------------------------------------|---------------------------|--------------------|--------------|-----|
| Degreasing           | Water                                   | 200                       | 45                 |              |     |
|                      | Degreasing agent                        | 1                         |                    | 60           |     |
| Washing              | Water                                   | 300                       | 37                 | 10           |     |
|                      | Water                                   | 100                       | 37                 |              |     |
| Neutralizing         | Neutralizing agent                      | 2                         |                    |              |     |
|                      | Sodium formate                          | 1                         |                    | 40           |     |
|                      | Sodium bicarbonate                      | 0.2                       |                    | 40           | 5.5 |
| <b>Wet finishing</b> | <b>Water</b>                            | <b>150</b>                | <b>50</b>          |              |     |
|                      | <b>pADD/<br/>pADD-DMENA<sup>®</sup></b> | <b>18</b>                 |                    | <b>60</b>    |     |
| Washing              | <b>Yellow dyes</b>                      | <b>2</b>                  |                    |              |     |
|                      | Water                                   | 300                       | 25                 | 5            |     |

Note: ① The dosage of chemicals was calculated based on the weight of the TWS tanned leather.

② In the pADD-DMENA trial, the yellow dye was not added.

## 2 <sup>1</sup>H-NMR of pADD, DMNA and DMENA

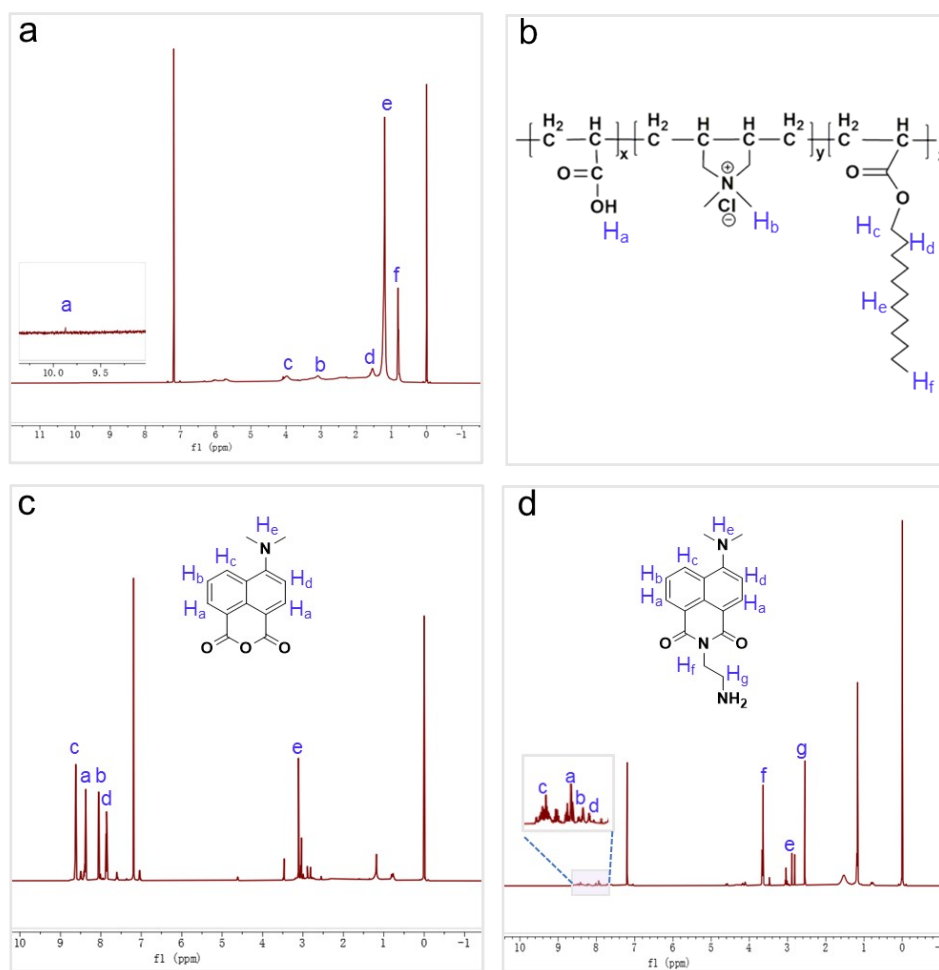

Fig. S1 <sup>1</sup>H-NMR spectrum of pADD (a), DMNA (c) and DMENA (d). (b) Structure of pADD.

The spectra of pADD are shown in Fig. S1a, and the signal at 10.05 ppm is attributed to the carboxyl group of AC, and the signal at 3.06 ppm is from the -CH<sub>3</sub> of DMDAAC<sup>1</sup>. Furthermore, the signals at 3.98 ppm, 1.17 ppm and 0.80 ppm are attributed to DA alkyl groups. Also, no signal appeared at almost 5.5 ppm, indicating that each monomer's unsaturated double bond was involved in the reaction<sup>2</sup>, demonstrating the synthesis of pADD. The signal peak of the methyl group in dimethylamine appears at 3.11 ppm<sup>3</sup>, as shown in Fig. S1c, indicating that dimethylamine has been successfully grafted onto naphthalimide. The <sup>1</sup>H-NMR spectra of DMENA show the signal peak characteristics of monomeric DMNA, but also, the

methylene signal peaks in ethylenediamine were close to 3.64 and 2.53 ppm, indicating that DMENA was prepared successfully (Fig. S1d).

### 3 <sup>1</sup>H-NMR of pADD-DMENA

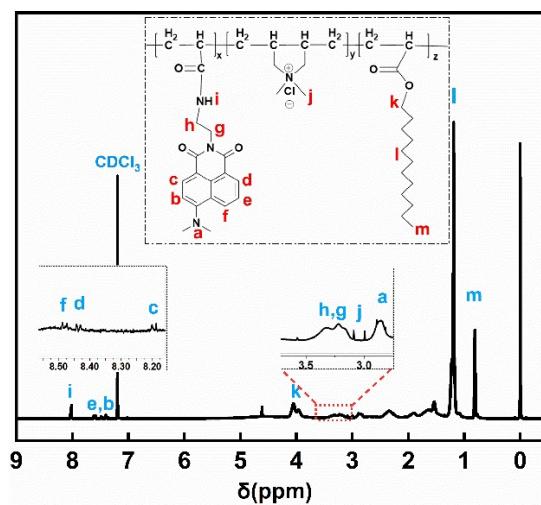

Fig. S2 <sup>1</sup>H-NMR spectrum of pADD-DMENA.

### 4 GPC of pADD

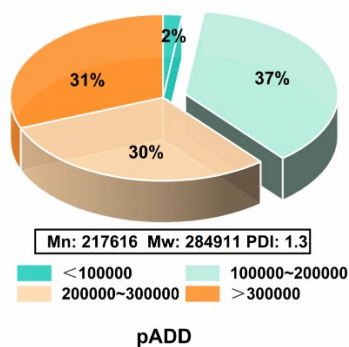

Fig. S3 The molecular weight of pADD.

### 5 DTG curves of crust leathers

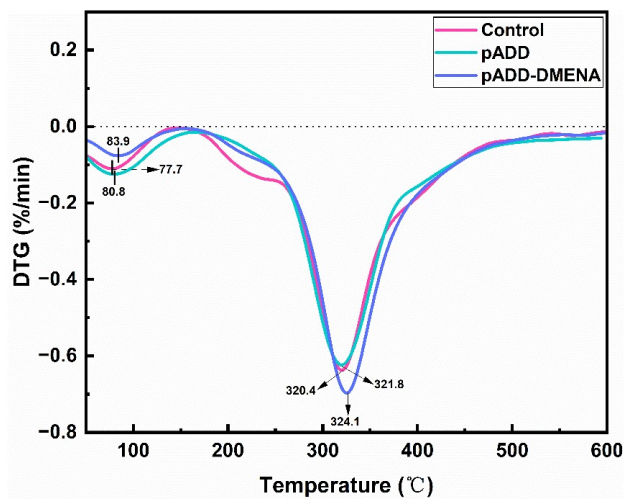

Fig. S4 DTG curves of different treated crust leathers.

## 6 Lightfastness comparison of different leather samples

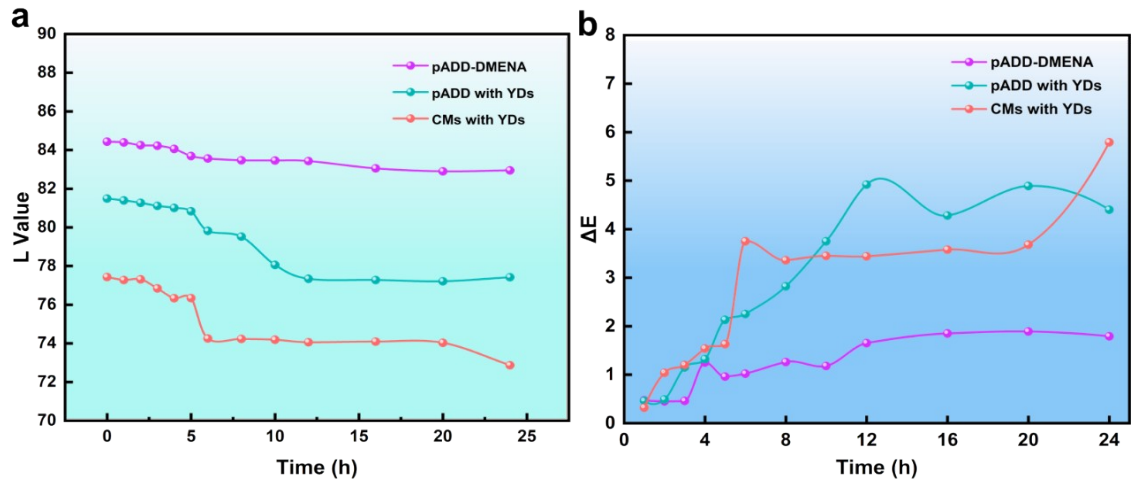

Fig. S5 (a) L value and (b) color change ( $\Delta E$ ) of different leather samples under UV irradiation for 24 h.

Tab. S3 Color comparison of different leather samples with various UV irradiation time

|             | pADD-DMENA                                                                          | pADD with YDs                                                                       | CMs with YDs                                                                          |
|-------------|-------------------------------------------------------------------------------------|-------------------------------------------------------------------------------------|---------------------------------------------------------------------------------------|
| <b>0 h</b>  |  |  |  |
| <b>4 h</b>  |  |  |  |
| <b>8 h</b>  |  |  |  |
| <b>12 h</b> |  |  |  |
| <b>16 h</b> |  |  |  |
| <b>20 h</b> |  |  |  |
| <b>24 h</b> |  |  |  |

## 7 Environmental impact assessment

Tab. S4 The TOC value of different wet finishing wastewater

| Samples    | TOC (mg/L)      |                | Absorption rate (%) |
|------------|-----------------|----------------|---------------------|
|            | Initial         | Residual       |                     |
| pADD-DMENA | 67445.5 ± 1.27  | 9432.2 ± 3.82  | 86.01%              |
| pADD       | 85997.8 ± 2.56  | 10701.7 ± 2.35 | 87.55%              |
| CMs        | 108077.7 ± 3.41 | 36445.9 ± 2.64 | 66.58%              |

Tab. S5 The value of BOD<sub>5</sub> and COD<sub>Cr</sub> of different wet finishing wastewater

| Samples    | BOD <sub>5</sub> (mg/L) | COD <sub>Cr</sub> (mg/L) | BOD <sub>5</sub> /COD |
|------------|-------------------------|--------------------------|-----------------------|
| pADD-DMENA | 3325.3 ± 0.54           | 9379.1 ± 0.48            | 0.35 ± 0.0045         |
| pADD       | 3545.9 ± 0.27           | 11068.1 ± 0.33           | 0.32 ± 0.0003         |
| CMs        | 6137.9 ± 0.59           | 22895.2 ± 0.62           | 0.27 ± 0.0007         |

### References

- 1 X. Xia, Y. Feng, J. Guo, S. Liu, J. Jin and Y. Yu, *Polym. Eng. Sci.*, 2017, **57**, 78–88.
- 2 D. Hao, X. Wang, X. Liu, X. Zhu, S. Sun, J. Li and O. Yue, *J. Hazard. Mater.*, 2020, **399**, 123048.
- 3 L. De Smet, G. Vancoillie, P. Minshall, K. Lava, I. Steyaert, E. Schoolaert, E. Van De Walle, P. Dubruel, K. De Clerck and R. Hoogenboom, *Nat Commun*, 2018, **9**, 1123.
